# Supplementary material for: Characterisation of the interaction of neuropilin-1 with heparin and a heparan sulfate mimetic library of heparin-derived sugars
Source: PubMed Central journal article supplement (PMC4089425; doi:10.7717/peerj.461), 2014-06-26
Supplement: peerj-02-461-s005.pdf [file peerj-02-461-s005.pdf]

KU2

4571\_054 12 (0.746)

2: TOF MSMS 1800.96LD+  
2.60e3

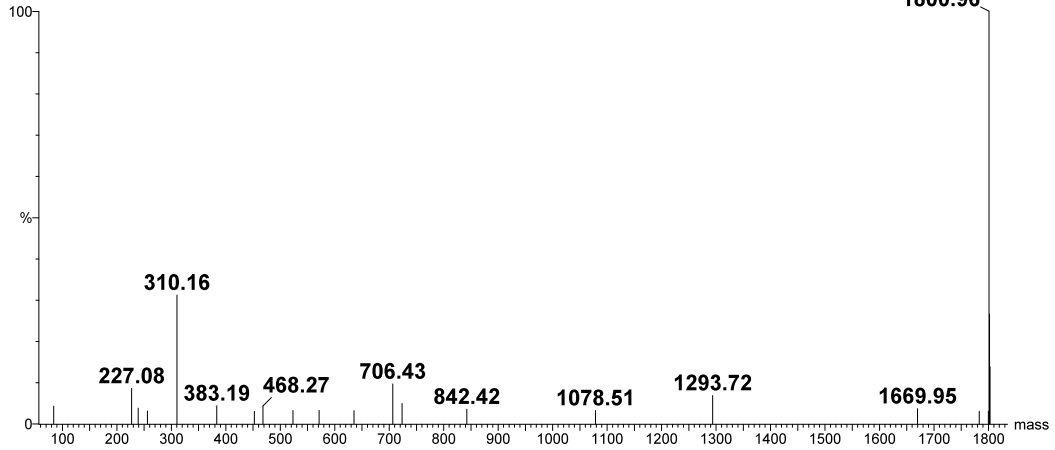

| Ion fragment mass (m/z) | Intensity | Assignment (error - ppm)                                                   |
|-------------------------|-----------|----------------------------------------------------------------------------|
| 1800.96                 | 2.60E+03  | VRIK(Biotin)PASWETGISM                                                     |
| 84.07                   | 1.11E+02  | K(-128)                                                                    |
| 227.08                  | 2.23E+02  | Biotin(0)                                                                  |
| 239.15                  | 9.89E+01  | b <sub>2</sub> -NH <sub>3</sub> (-1.1)                                     |
| 256.17                  | 8.07E+01  | b <sub>2</sub> (-27) / PAS(159) / SW-H <sub>2</sub> O(242)                 |
| 310.16                  | 8.10E+02  | K(Biotin)(0)                                                               |
| 383.19                  | 1.13E+02  | ETGI-H <sub>2</sub> O(-6.6)                                                |
| 452.24                  | 7.84E+01  | K(Biotin)P(16)                                                             |
| 468.27                  | 1.11E+02  | IK(Biotin)(13)                                                             |
| 523.28                  | 8.38E+01  | K(Biotin)PA(20)                                                            |
| 571.26                  | 8.44E+01  | PASWE(16)                                                                  |
| 635.36                  | 8.28E+01  |                                                                            |
| 706.43                  | 2.51E+02  | b <sub>4</sub> -NH <sub>3</sub> (33) / IK(Biotin)PAS-NH <sub>3</sub> (100) |
| 723.48                  | 1.28E+02  | b <sub>4</sub> (64) / IK(Biotin)PAS(130)                                   |
| 842.42                  | 9.22E+01  | PASWETGI(19)                                                               |
| 1078.51                 | 8.40E+01  | y <sub>10</sub> (21)                                                       |
| 1293.72                 | 1.78E+02  | b <sub>9</sub> (33)                                                        |
| 1669.95                 | 9.57E+01  | b <sub>13</sub> +H <sub>2</sub> O(46)                                      |
| 1783.01                 | 7.92E+01  | MH-H <sub>2</sub> O(60)                                                    |
| 1799.83                 | 7.92E+01  |                                                                            |
| 1800.96                 | 2.60E+03  | MH(26)                                                                     |

KU2  
4571\_054 18 (0.934)

2: TOF MSMS 1494.76LD+  
1.35e3

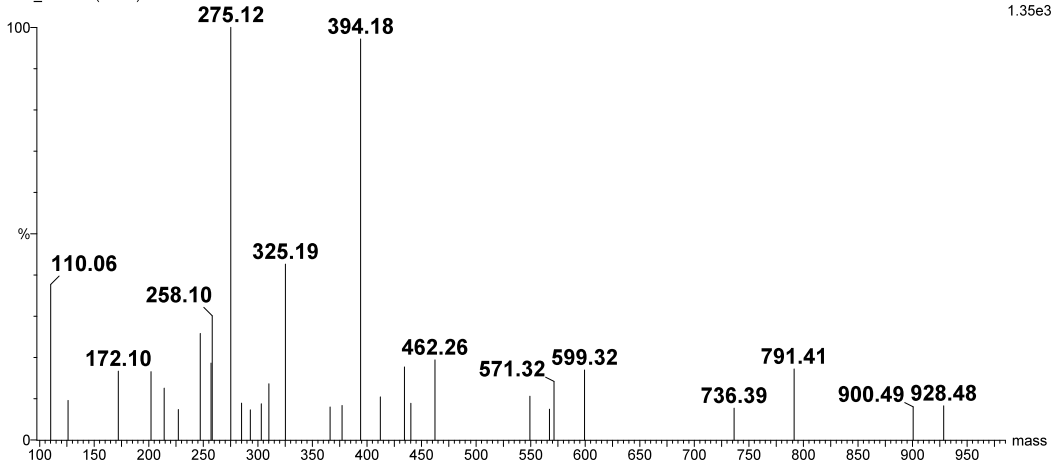

| Ion fragment mass (m/z) | Intensity | Assignment (error - ppm)     |
|-------------------------|-----------|------------------------------|
| 110.06                  | 5.10E+02  |                              |
| 126.08                  | 1.29E+02  | K(-90)                       |
| 172.1                   | 2.25E+02  | a <sub>3</sub> (-47)         |
| 202.1                   | 2.24E+02  |                              |
| 214.1                   | 1.69E+02  |                              |
| 227.09                  | 9.94E+01  | Biotin(44)                   |
| 247.13                  | 3.49E+02  | C(Carbamidomethyl)GG-28(178) |
| 257.11                  | 2.52E+02  |                              |
| 258.1                   | 4.06E+02  |                              |
| 275.12                  | 1.35E+03  | C(Carbamidomethyl)GG(142)    |
| 285.11                  | 1.21E+02  |                              |
| 293.14                  | 9.84E+01  |                              |
| 303.12                  | 1.18E+02  |                              |
| 310.16                  | 1.84E+02  | K(Biotin) (0)                |
| 325.19                  | 5.77E+02  |                              |
| 366.18                  | 1.08E+02  |                              |
| 377.16                  | 1.13E+02  |                              |
| 394.18                  | 1.32E+03  | y <sub>4</sub> (104)         |
| 412.22                  | 1.41E+02  |                              |
| 434.26                  | 2.40E+02  |                              |
| 440.19                  | 1.20E+02  |                              |
| 462.26                  | 2.63E+02  |                              |
| 549.26                  | 1.43E+02  |                              |
| 567.27                  | 1.01E+02  |                              |
| 571.32                  | 1.91E+02  |                              |
| 599.32                  | 2.29E+02  |                              |
| 736.39                  | 1.04E+02  |                              |
| 791.41                  | 2.33E+02  |                              |
| 900.49                  | 1.08E+02  |                              |
| 928.48                  | 1.12E+02  |                              |

KU2

4571\_054 31 (1.341)

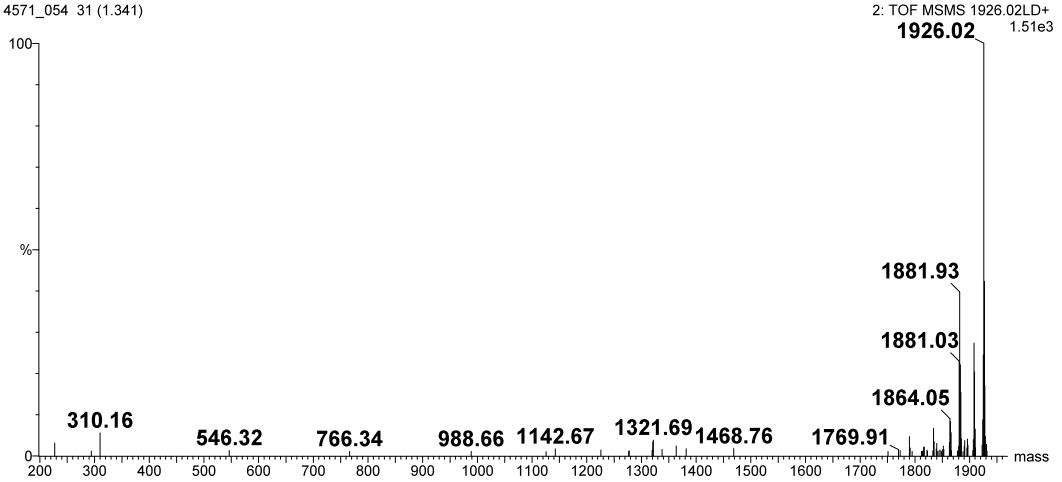

| Ion fragment mass (m/z) | Intensity | Assignment (error - ppm)               |
|-------------------------|-----------|----------------------------------------|
| 1926.02                 | 1.51E+03  | DK(Biotin)NISRKPGNVLCTL(Ammonium)      |
| 227.08                  | 4.68E+01  | Biotin(0)                              |
| 294.15                  | 1.68E+01  |                                        |
| 310.16                  | 8.42E+01  | K(Biotin)(0)                           |
| 546.32                  | 1.99E+01  |                                        |
| 766.34                  | 1.62E+01  | b <sub>5</sub> -H <sub>2</sub> O(-20)  |
| 988.66                  | 1.64E+01  |                                        |
| 1125.65                 | 1.56E+01  | y <sub>10</sub> -NH <sub>3</sub> (-54) |
| 1142.67                 | 2.53E+01  | y <sub>10</sub> (-58)                  |
| 1225.68                 | 2.08E+01  |                                        |
| 1276.69                 | 1.62E+01  |                                        |
| 1319.63                 | 2.09E+01  | b <sub>10</sub> -NH <sub>3</sub> (-17) |
| 1337.74                 | 2.35E+01  |                                        |
| 1363.73                 | 3.65E+01  |                                        |
| 1381.71                 | 2.62E+01  |                                        |
| 1468.76                 | 2.67E+01  |                                        |
| 1750.95                 | 1.60E+01  |                                        |
| 1769.91                 | 2.24E+01  |                                        |
| 1789.98                 | 7.06E+01  |                                        |
| 1812.03                 | 1.58E+01  |                                        |
| 1832.87                 | 1.88E+01  |                                        |
| 1862.96                 | 4.89E+01  |                                        |
| 1877.99                 | 1.71E+01  |                                        |
| 1905.84                 | 1.91E+01  |                                        |
| 1923                    | 3.95E+01  |                                        |

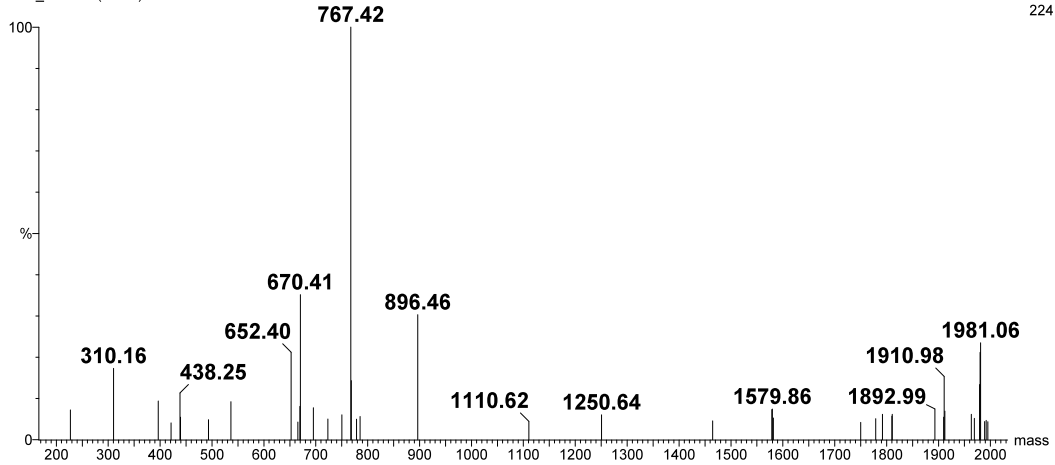

| 2024.10                 | 224       | TLPPSRDELTK(Biotin)NQVSL                                                   |
|-------------------------|-----------|----------------------------------------------------------------------------|
| Ion fragment mass (m/z) | Intensity | Assignment (error - ppm)                                                   |
| 227.08                  | 1.60E+01  | Biotin(0)                                                                  |
| 310.16                  | 3.86E+01  | K(Biotin)(0)                                                               |
| 396.23                  | 2.09E+01  |                                                                            |
| 421.22                  | 9.04E+00  | PPSR-NH <sub>3</sub> (1.4)                                                 |
| 438.25                  | 2.52E+01  | PPSR(9.3) / TK(Biotin)-H <sub>2</sub> O(75) / PSRD-H <sub>2</sub> O(92)    |
| 493.25                  | 1.08E+01  |                                                                            |
| 536.27                  | 2.05E+01  | PPSRD-NH <sub>3</sub> (44)                                                 |
| 652.4                   | 4.72E+01  | b <sub>6</sub> (34)                                                        |
| 665.29                  | 9.50E+00  | PPSRDE-NH <sub>3</sub> (1.6) / LTK(Biotin)N-H <sub>2</sub> O(-81)          |
| 669.43                  | 1.80E+01  |                                                                            |
| 695.44                  | 1.72E+01  |                                                                            |
| 723.38                  | 1.11E+01  |                                                                            |
| 750.37                  | 1.34E+01  | b <sub>7</sub> -NH <sub>3</sub> (-11)                                      |
| 767.42                  | 2.24E+02  | PPSRDEL-28(20) / b <sub>7</sub> (20) / LPPSRDE-28(20)                      |
| 778.42                  | 1.10E+01  | LPPSRDE-NH <sub>3</sub> (60) / PPSRDEL-NH <sub>3</sub> (60)                |
| 785.41                  | 1.25E+01  | DELTK(Biotin)-28(30)                                                       |
| 896.46                  | 6.77E+01  | y <sub>6</sub> -H <sub>2</sub> O(-6.5) / PPSRDEL(14) / b <sub>8</sub> (14) |
| 1110.62                 | 9.71E+00  | y <sub>8</sub> -H <sub>2</sub> O(20) / b <sub>10</sub> (37)                |
| 1250.64                 | 1.34E+01  | PPSRDELTK(Biotin)(16) / PSRDELTK(Biotin)N-NH <sub>3</sub> (45)             |
| 1464.77                 | 1.01E+01  | b <sub>11</sub> (13) / PPSRDELTK(Biotin)NQ-28(30)                          |
| 1578.81                 | 1.62E+01  | b <sub>12</sub> (9.8)                                                      |
| 1749.9                  | 9.31E+00  |                                                                            |
| 1778.93                 | 1.13E+01  |                                                                            |
| 1791.97                 | 1.37E+01  | LPPSRDELTK(Biotin)NQVS(36) / y <sub>14</sub> -H <sub>2</sub> O(36)         |
| 1810                    | 1.27E+01  | y <sub>14</sub> (46)                                                       |
| 1892.99                 | 1.65E+01  | b <sub>15</sub> (19)                                                       |
| 1910.06                 | 1.21E+01  |                                                                            |
| 1963.1                  | 1.37E+01  |                                                                            |
| 1968.98                 | 1.15E+01  |                                                                            |
| 1979.15                 | 2.99E+01  |                                                                            |
| 1989                    | 9.74E+00  |                                                                            |
| 1995.08                 | 9.66E+00  |                                                                            |

KU2  
4571\_054 68 (2.498)

2: TOF MSMS 2125.14LD+  
88.3

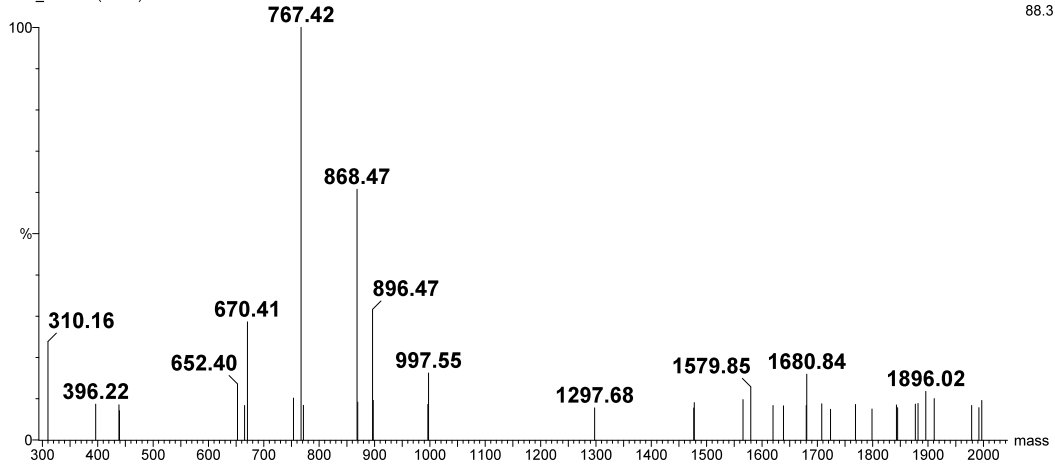

| Ion fragment mass (m/z) | Intensity | Assignment (error - ppm)                  |
|-------------------------|-----------|-------------------------------------------|
| 2125.14                 | 88.30     | VVDVSHEDPEVK(Biotin)FNW                   |
| 310.16                  | 2.10E+01  | K(Biotin)(0)                              |
| 396.22                  | 7.65E+00  |                                           |
| 438.25                  | 7.50E+00  |                                           |
| 652.4                   | 1.19E+01  | PEVK(Biotin)-28(79)                       |
| 665.29                  | 7.35E+00  | VSHEDP(1.6) / DVSHED-H <sub>2</sub> O(56) |
| 670.41                  | 2.53E+01  |                                           |
| 753.44                  | 8.94E+00  |                                           |
| 767.42                  | 8.83E+01  | DPEVK(Biotin)-28(58)                      |
| 771.49                  | 7.40E+00  |                                           |
| 868.47                  | 5.37E+01  |                                           |
| 896.47                  | 2.79E+01  | EDPEVK(Biotin)-28(58)                     |
| 996.48                  | 7.55E+00  |                                           |
| 1297.68                 | 6.86E+00  |                                           |
| 1476.73                 | 6.81E+00  |                                           |
| 1565.76                 | 8.62E+00  |                                           |
| 1579.85                 | 1.13E+01  |                                           |
| 1619.84                 | 7.36E+00  |                                           |
| 1638.8                  | 7.27E+00  |                                           |
| 1679.94                 | 7.36E+00  | VVDVSHEDPEVK(Biotin)F-28(78)              |
| 1708.02                 | 7.71E+00  | VVDVSHEDPEVK(Biotin)F(126)                |
| 1723.92                 | 6.52E+00  |                                           |
| 1768.98                 | 7.58E+00  |                                           |
| 1798.82                 | 6.59E+00  |                                           |
| 1842.84                 | 7.47E+00  |                                           |
| 1876.88                 | 7.62E+00  |                                           |
| 1881.84                 | 7.78E+00  |                                           |
| 1896.02                 | 1.04E+01  |                                           |
| 1911.03                 | 8.83E+00  |                                           |
| 1978.9                  | 7.34E+00  |                                           |
| 1991.94                 | 6.89E+00  |                                           |
| 1996.97                 | 8.44E+00  |                                           |

KU2  
4571\_054 76 (2.748)

2: TOF MSMS 1452.74LD+  
994

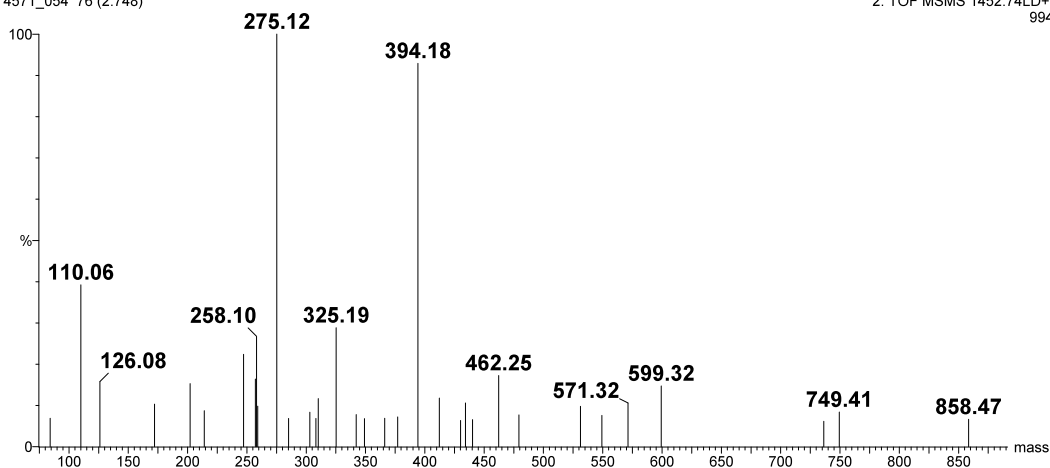

| 1452.74                 | 994       | AGAFRSDK(Biotin)C(Carbamidomethyl)GGT |
|-------------------------|-----------|---------------------------------------|
| Ion fragment mass (m/z) | Intensity | Assignment (error - ppm)              |
| 84.07                   | 6.80E+01  | K(-128)                               |
| 110.06                  | 3.90E+02  |                                       |
| 126.08                  | 1.56E+02  | K(-90)                                |
| 172.1                   | 1.02E+02  | a <sub>3</sub> (-47)                  |
| 202.1                   | 1.52E+02  |                                       |
| 214.1                   | 8.64E+01  |                                       |
| 247.13                  | 2.22E+02  | C(Carbamidomethyl)GG-28(178)          |
| 257.11                  | 1.63E+02  |                                       |
| 275.12                  | 9.94E+02  | C(Carbamidomethyl)GG(142)             |
| 285.11                  | 6.76E+01  |                                       |
| 303.12                  | 8.27E+01  |                                       |
| 308.17                  | 6.77E+01  |                                       |
| 310.16                  | 1.16E+02  | K(Biotin)(0)                          |
| 325.19                  | 2.86E+02  |                                       |
| 342.21                  | 7.69E+01  | RSD-NH <sub>3</sub> (202)             |
| 349.15                  | 6.73E+01  |                                       |
| 366.18                  | 6.80E+01  |                                       |
| 377.15                  | 7.16E+01  |                                       |
| 394.18                  | 9.24E+02  | y <sub>4</sub> (104)                  |
| 412.21                  | 1.17E+02  |                                       |
| 430.2                   | 6.30E+01  |                                       |
| 434.26                  | 1.05E+02  | AFRS-28(21)                           |
| 440.19                  | 6.48E+01  |                                       |
| 462.25                  | 1.71E+02  | AFRS(8.8)                             |
| 479.29                  | 7.63E+01  |                                       |
| 531.27                  | 9.69E+01  |                                       |
| 549.29                  | 7.51E+01  | AFRSD-28(22)                          |
| 571.32                  | 1.05E+02  |                                       |
| 599.32                  | 1.46E+02  |                                       |
| 736.39                  | 6.08E+01  |                                       |
| 749.41                  | 8.32E+01  |                                       |
| 858.47                  | 6.56E+01  |                                       |

KU2  
4571\_054 86 (3.061)

2: TOF MSMS 1790.91LD+  
1.03e3

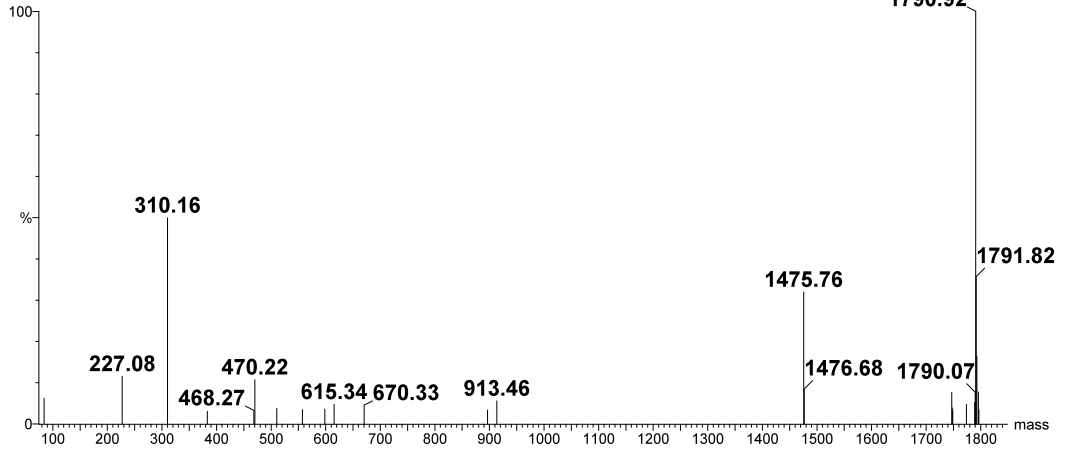

| Ion fragment mass (m/z) | Intensity | Assignment (error - ppm)               |
|-------------------------|-----------|----------------------------------------|
| 1790.92                 | 1.03E+03  | TVDK(Biotin)SRWQQGNVF                  |
| 84.07                   | 6.36E+01  | K(-128) Q(-128)                        |
| 227.08                  | 1.19E+02  | Biotin(0)                              |
| 310.16                  | 5.17E+02  | K(Biotin)(0)                           |
| 383.17                  | 3.11E+01  |                                        |
| 468.27                  | 3.36E+01  |                                        |
| 510.23                  | 3.86E+01  | QQGNV-NH <sub>3</sub> (-1.3)           |
| 557.26                  | 3.54E+01  | DK(Biotin)S(38)                        |
| 598.33                  | 3.69E+01  | K(Biotin)SR(28)                        |
| 615.34                  | 4.90E+01  |                                        |
| 670.33                  | 4.64E+01  | b <sub>4</sub> (11)                    |
| 896.43                  | 3.45E+01  | b <sub>6</sub> -NH <sub>3</sub> (0.60) |
| 913.46                  | 5.76E+01  | b <sub>6</sub> (4.4)                   |
| 1475.76                 | 3.30E+02  | y <sub>10</sub> (26)                   |
| 1746.86                 | 7.88E+01  |                                        |
| 1773.88                 | 4.91E+01  | MH-NH <sub>3</sub> (24)                |
| 1788.84                 | 5.40E+01  |                                        |

KU2  
4571\_054 99 (3.468)

2: TOF MSMS 1381.71LD+  
979

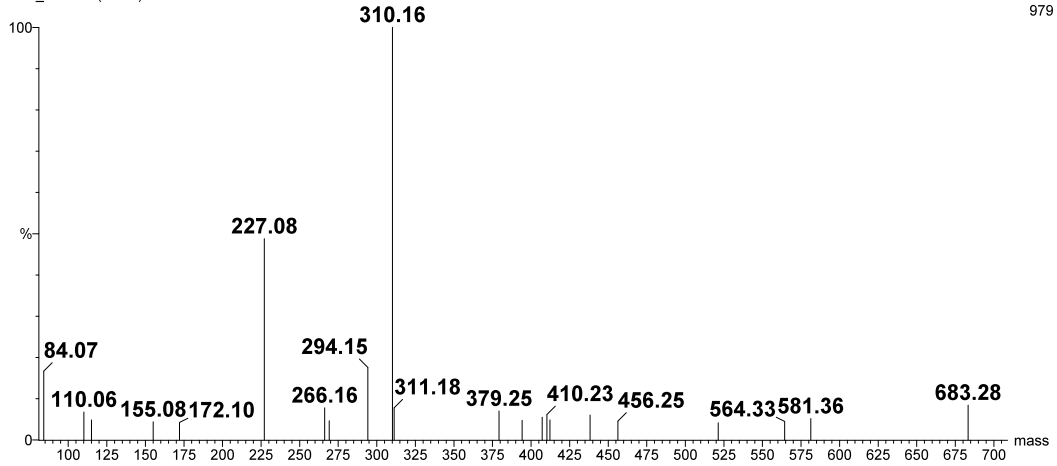

| 1381.71                 | 979       | NGK(Biotin)EYKCKVS                    |
|-------------------------|-----------|---------------------------------------|
| Ion fragment mass (m/z) | Intensity | Assignment (error - ppm)              |
| 84.07                   | 1.63E+02  | K(-128)                               |
| 110.06                  | 6.61E+01  |                                       |
| 115.08                  | 4.71E+01  |                                       |
| 155.08                  | 4.28E+01  | b <sub>2</sub> -NH <sub>3</sub> (225) |
| 172.1                   | 4.09E+01  | b <sub>2</sub> (165)                  |
| 227.08                  | 4.78E+02  | Biotin(0)                             |
| 266.16                  | 7.58E+01  |                                       |
| 269.16                  | 4.50E+01  |                                       |
| 294.15                  | 1.71E+02  |                                       |
| 310.16                  | 9.80E+02  | K(Biotin)(0)                          |
| 379.25                  | 6.82E+01  |                                       |
| 394.23                  | 4.65E+01  |                                       |
| 407.25                  | 5.35E+01  |                                       |
| 438.22                  | 5.87E+01  |                                       |
| 456.25                  | 4.39E+01  | K(Biotin)E-28(49)                     |
| 521.33                  | 4.06E+01  |                                       |
| 564.33                  | 4.34E+01  | y <sub>5</sub> (22)                   |
| 581.36                  | 5.02E+01  |                                       |
| 683.28                  | 8.24E+01  |                                       |



KU2

4571\_054 101 (3.530)

2: TOF MSMS 1516.72LD+  
311

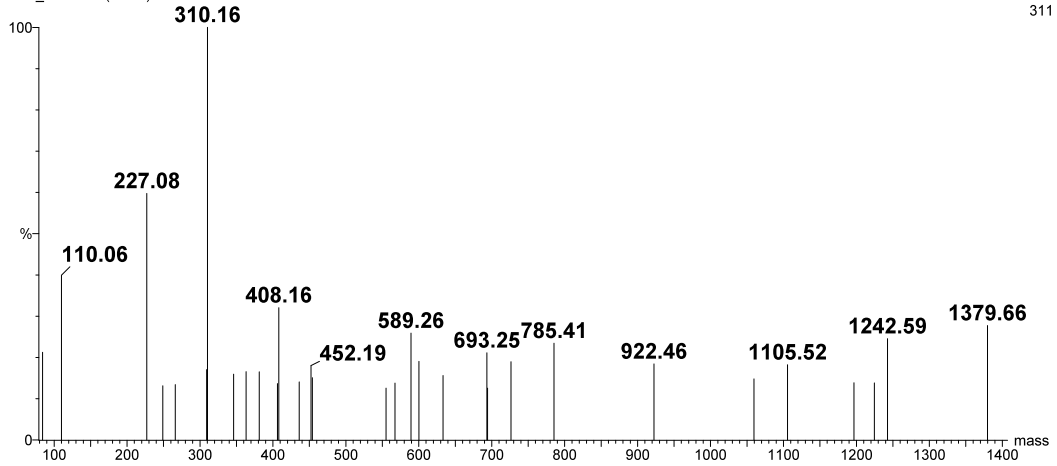

| 1516.72                 | 311       | QVIFEGEIGK(Biotin)GN                                                        |
|-------------------------|-----------|-----------------------------------------------------------------------------|
| Ion fragment mass (m/z) | Intensity | Assignment (error - ppm)                                                    |
| 84.07                   | 6.59E+01  | Q(-128) / K(-128)                                                           |
| 110.06                  | 1.24E+02  |                                                                             |
| 227.08                  | 1.86E+02  | Biotin(0)                                                                   |
| 249.09                  | 4.07E+01  | FE-28(-134)                                                                 |
| 266.12                  | 4.16E+01  |                                                                             |
| 310.16                  | 3.11E+02  | K(Biotin)(0)                                                                |
| 346.12                  | 4.94E+01  |                                                                             |
| 363.14                  | 5.14E+01  |                                                                             |
| 381.15                  | 5.12E+01  |                                                                             |
| 406.18                  | 4.23E+01  |                                                                             |
| 436.15                  | 4.36E+01  |                                                                             |
| 452.19                  | 5.58E+01  | GK(Biotin)G-NH <sub>3</sub> (-14)                                           |
| 567.26                  | 4.28E+01  |                                                                             |
| 589.26                  | 8.03E+01  | a <sub>5</sub> (-126)                                                       |
| 600.26                  | 5.91E+01  | b <sub>5</sub> -NH <sub>3</sub> (-71)                                       |
| 633.24                  | 4.85E+01  | FEGEIG(-76)                                                                 |
| 693.25                  | 6.56E+01  | EIGK(Biotin)G-H <sub>2</sub> O(-128) / GEIGK(Biotin)-H <sub>2</sub> O(-128) |
| 726.32                  | 5.89E+01  |                                                                             |
| 785.41                  | 7.28E+01  | b <sub>7</sub> -H <sub>2</sub> O(35)                                        |
| 922.46                  | 5.72E+01  |                                                                             |
| 1059.5                  | 4.59E+01  |                                                                             |
| 1105.52                 | 5.66E+01  |                                                                             |
| 1196.57                 | 4.29E+01  |                                                                             |
| 1224.61                 | 4.29E+01  |                                                                             |
| 1242.59                 | 7.62E+01  |                                                                             |
| 1379.66                 | 8.61E+01  |                                                                             |

KU2

4571\_054 122 (4.187)

2: TOF MSMS 1811.92LD+  
435

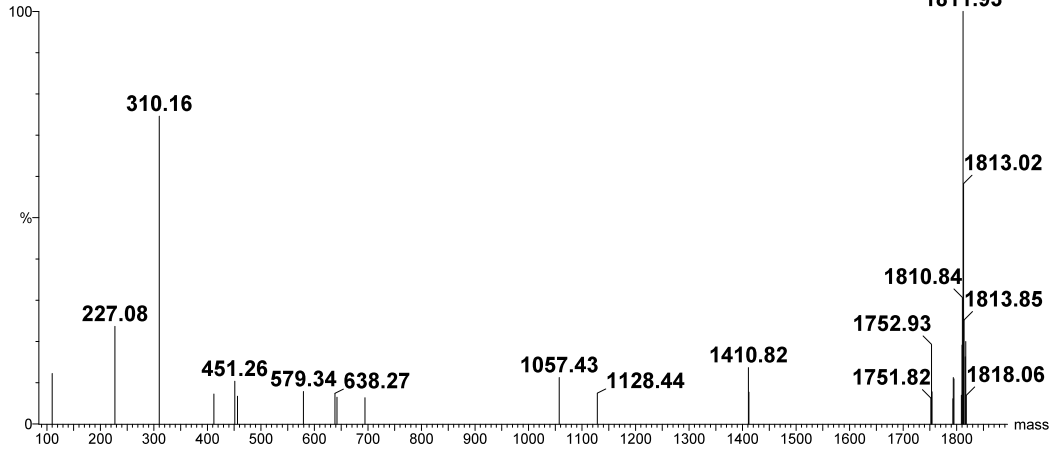

| Ion fragment mass (m/z) | Intensity | Assignment (error - ppm)                    |
|-------------------------|-----------|---------------------------------------------|
| 110.06                  | 5.30E+01  |                                             |
| 227.08                  | 1.03E+02  | Biotin(0)                                   |
| 310.16                  | 3.24E+02  | K(Biotin)(0)                                |
| 412.21                  | 3.14E+01  | K(Biotin)G(21) / ADEN-H <sub>2</sub> O(155) |
| 451.26                  | 4.48E+01  |                                             |
| 456.15                  | 2.92E+01  |                                             |
| 579.34                  | 3.41E+01  |                                             |
| 638.27                  | 3.20E+01  |                                             |
| 642.24                  | 2.81E+01  |                                             |
| 694.37                  | 2.75E+01  |                                             |
| 1057.43                 | 4.88E+01  |                                             |
| 1128.44                 | 3.21E+01  |                                             |
| 1410.82                 | 5.93E+01  | y <sub>10</sub> (48)                        |
| 1751.82                 | 2.70E+01  |                                             |
| 1792.99                 | 2.64E+01  |                                             |
| 1808.83                 | 3.02E+01  |                                             |
| 1813.02                 | 2.53E+02  |                                             |

KU2

4571\_054 139 (4.719)

2: TOF MSMS 2074.06LD+  
268

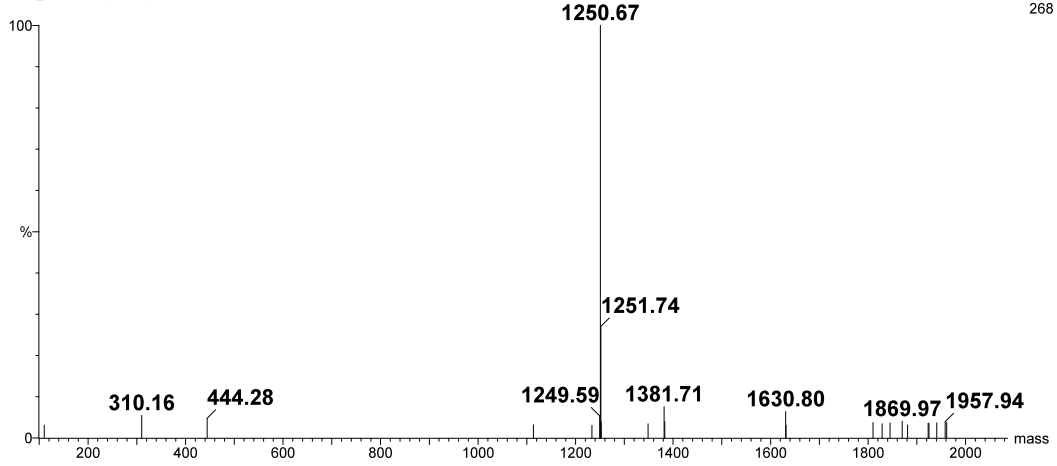

| 2074.06                 | 268       | MVVGHQGDHWK(Biotin)EGRVL               |
|-------------------------|-----------|----------------------------------------|
| Ion fragment mass (m/z) | Intensity | Assignment (error - ppm)               |
| 110.06                  | 8.21E+00  | H(-102)                                |
| 310.16                  | 1.45E+01  | K(Biotin)(0)                           |
| 444.28                  | 1.26E+01  | y <sub>4</sub> (-29)                   |
| 1113.68                 | 8.41E+00  | y <sub>7</sub> (83)                    |
| 1233.62                 | 8.10E+00  | y <sub>8</sub> -NH <sub>3</sub> (0.22) |
| 1249.59                 | 1.41E+01  |                                        |
| 1348.77                 | 9.12E+00  | y <sub>9</sub> -NH <sub>3</sub> (91)   |
| 1381.71                 | 2.02E+01  |                                        |
| 1630.8                  | 1.71E+01  | b <sub>12</sub> (46)                   |
| 1809.94                 | 9.99E+00  |                                        |
| 1828.9                  | 9.11E+00  |                                        |
| 1845                    | 9.63E+00  |                                        |
| 1869.97                 | 1.08E+01  |                                        |
| 1880.93                 | 8.29E+00  |                                        |
| 1923.14                 | 9.60E+00  |                                        |
| 1940.98                 | 9.75E+00  |                                        |
| 1957.94                 | 1.03E+01  |                                        |
| 1961.06                 | 1.01E+01  | b <sub>15</sub> +H <sub>2</sub> O(68)  |

KU2

4571\_054 152 (5.126)

2: TOF MSMS 1182.65LD+  
720

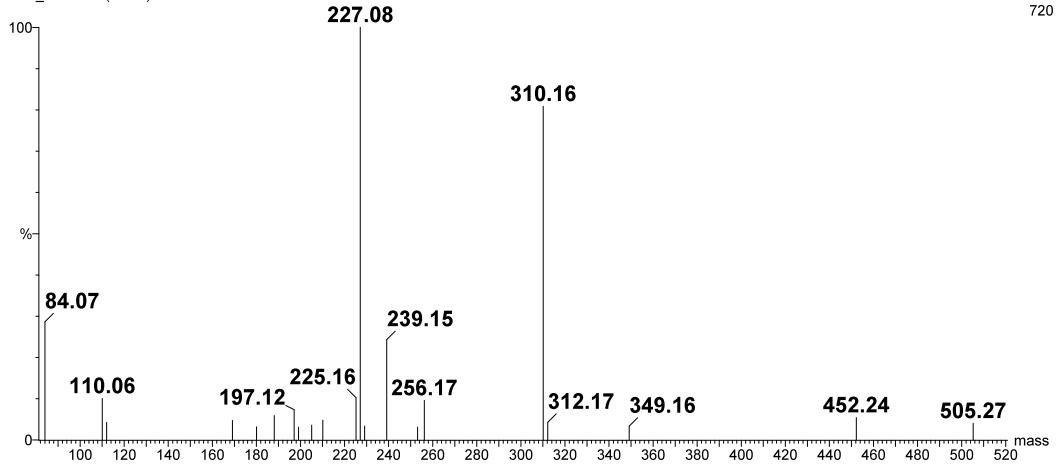

| Ion fragment mass (m/z) | Intensity | Assignment (error - ppm)               |
|-------------------------|-----------|----------------------------------------|
| 84.07                   | 2.06E+02  | K(-128)                                |
| 110.06                  | 7.22E+01  |                                        |
| 169.12                  | 3.38E+01  | PA(135)                                |
| 180.09                  | 2.26E+01  |                                        |
| 188.06                  | 4.23E+01  |                                        |
| 197.12                  | 5.23E+01  |                                        |
| 205.1                   | 2.56E+01  | y <sub>1</sub> (14)                    |
| 210.15                  | 3.43E+01  |                                        |
| 225.16                  | 7.30E+01  |                                        |
| 227.08                  | 7.20E+02  | Biotin(0)                              |
| 239.15                  | 1.74E+02  | b <sub>2</sub> -NH <sub>3</sub> (-1.1) |
| 253.16                  | 2.22E+01  | RI-NH <sub>3</sub> (-23)               |
| 256.17                  | 6.88E+01  | b <sub>2</sub> (-27) / PAS(159)        |
| 310.16                  | 5.82E+02  | K(Biotin)(0)                           |
| 349.16                  | 2.34E+01  |                                        |
| 452.24                  | 3.88E+01  | K(Biotin)P(16)                         |
| 505.27                  | 2.89E+01  |                                        |

KU2

4571\_054 184 (6.126)

2: TOF MSMS 1909.00LD+  
1908.01 269

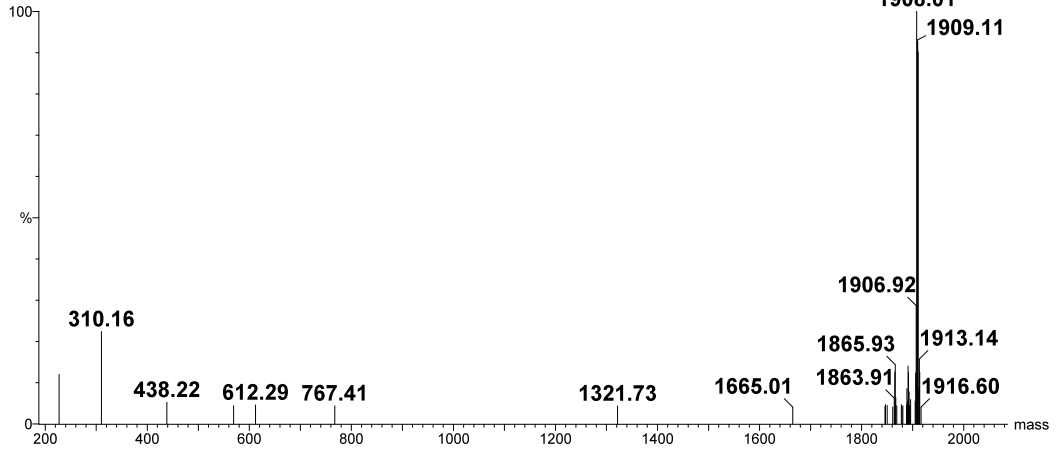

| Ion fragment mass (m/z) | Intensity | Assignment (error - ppm)             |
|-------------------------|-----------|--------------------------------------|
| 227.08                  | 3.23E+01  | Biotin(0)                            |
| 310.16                  | 6.01E+01  | K(Biotin)(0)                         |
| 438.22                  | 1.40E+01  | NVLK-NH <sub>3</sub> (-117)          |
| 569.27                  | 1.19E+01  |                                      |
| 612.29                  | 1.23E+01  | SRKPGN-28(-110)                      |
| 767.41                  | 1.17E+01  | b <sub>5</sub> -NH <sub>3</sub> (92) |
| 1321.73                 | 1.17E+01  |                                      |
| 1665.01                 | 1.08E+01  |                                      |
| 1845.97                 | 1.13E+01  |                                      |
| 1860.93                 | 1.09E+01  |                                      |
| 1877.95                 | 1.25E+01  |                                      |
| 1880.95                 | 1.18E+01  |                                      |
| 1887.98                 | 1.25E+01  |                                      |
| 1904.95                 | 1.49E+01  |                                      |
| 1911.01                 | 2.42E+02  |                                      |
| 1916.6                  | 1.08E+01  |                                      |

KU2  
4571\_054 233 (7.659)

2: TOF MSMS 1628.70LD+  
382

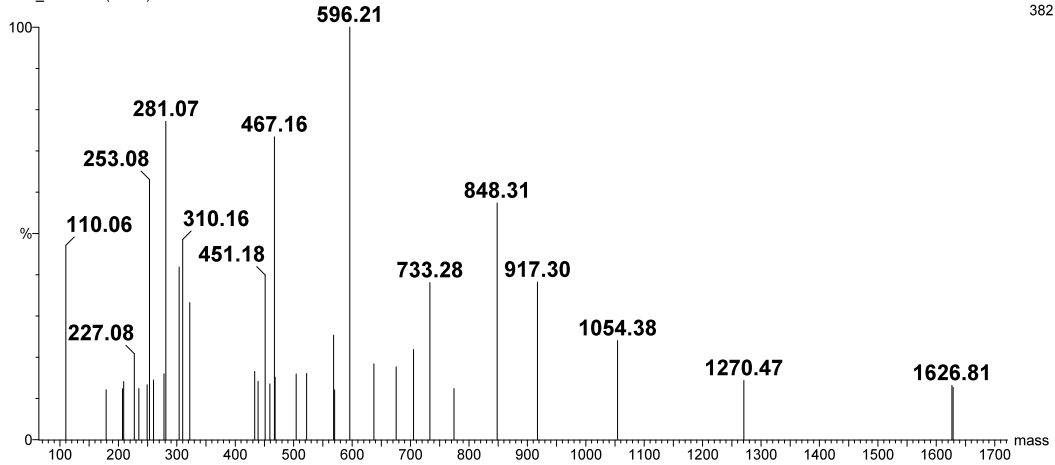

| 1628.70                 | 382       | HSYHPSEK(Biotin)CEW                                                                        |
|-------------------------|-----------|--------------------------------------------------------------------------------------------|
| Ion fragment mass (m/z) | Intensity | Assignment (error - ppm)                                                                   |
| 110.06                  | 1.80E+02  | H(-102)                                                                                    |
| 179.09                  | 4.61E+01  | a <sub>2</sub> -H <sub>2</sub> O(-15)                                                      |
| 207.08                  | 4.71E+01  | b <sub>2</sub> -H <sub>2</sub> O(-37) / HP-28(-213)                                        |
| 227.08                  | 7.94E+01  | Biotin(0)                                                                                  |
| 235.09                  | 4.71E+01  | HP(-123)                                                                                   |
| 249.1                   | 5.08E+01  |                                                                                            |
| 253.08                  | 2.41E+02  |                                                                                            |
| 260.11                  | 5.52E+01  |                                                                                            |
| 278.12                  | 6.09E+01  |                                                                                            |
| 281.07                  | 2.95E+02  |                                                                                            |
| 304.1                   | 1.60E+02  | HPS-H <sub>2</sub> O(-133)                                                                 |
| 310.16                  | 1.85E+02  | K(Biotin)(0)                                                                               |
| 322.12                  | 1.27E+02  | HPS(-96)                                                                                   |
| 433.15                  | 6.31E+01  | HPSE-H <sub>2</sub> O(-76)                                                                 |
| 439.16                  | 5.39E+01  |                                                                                            |
| 451.18                  | 1.52E+02  | HPSE(-30)                                                                                  |
| 459.18                  | 5.16E+01  |                                                                                            |
| 467.16                  | 2.80E+02  | EK(Biotin)-NH <sub>3</sub> (-77) / YHPS-H <sub>2</sub> O(-94) / SYHP-H <sub>2</sub> O(-94) |
| 504.2                   | 6.07E+01  |                                                                                            |
| 522.23                  | 6.12E+01  |                                                                                            |
| 568.23                  | 9.65E+01  |                                                                                            |
| 596.21                  | 3.82E+02  | YHPSE-H <sub>2</sub> O(-61)                                                                |
| 637.26                  | 7.01E+01  |                                                                                            |
| 675.3                   | 6.73E+01  |                                                                                            |
| 705.27                  | 8.34E+01  |                                                                                            |
| 733.28                  | 1.45E+02  |                                                                                            |
| 774.31                  | 4.73E+01  | y <sub>4</sub> -NH <sub>3</sub> (19)                                                       |
| 848.31                  | 2.19E+02  |                                                                                            |
| 917.3                   | 1.46E+02  |                                                                                            |
| 1054.38                 | 9.17E+01  | YHPSEK(Biotin)C-NH <sub>3</sub> (-30)                                                      |
| 1270.47                 | 5.47E+01  | SYHPSEK(Biotin)CE-NH <sub>3</sub> (-13)                                                    |
| 1626.81                 | 5.02E+01  |                                                                                            |

KU2

4571\_054 279 (9.097)

2: TOF MSMS 2107.12LD+  
8.76

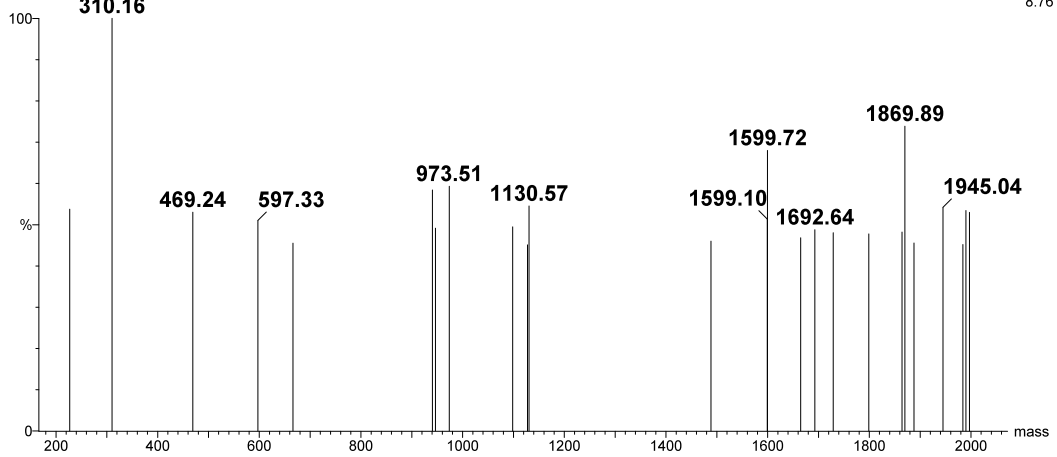

| 2107.12                 | 8.76      | VVVDVSHEDPEVK(Biotin)FNW -H <sub>2</sub> O |
|-------------------------|-----------|--------------------------------------------|
| Ion fragment mass (m/z) | Intensity | Assignment (error - ppm)                   |
| 469.24                  | 4.64E+00  |                                            |
| 597.33                  | 4.46E+00  |                                            |
| 666.29                  | 3.98E+00  |                                            |
| 940.45                  | 5.11E+00  |                                            |
| 946.45                  | 4.30E+00  |                                            |
| 973.51                  | 5.19E+00  |                                            |
| 1098.54                 | 4.33E+00  |                                            |
| 1127.55                 | 3.95E+00  | y <sub>7</sub> -H <sub>2</sub> O(14)       |
| 1130.57                 | 4.77E+00  | SHEDPEVK(Biotin)-H <sub>2</sub> O(68)      |
| 1488.52                 | 4.03E+00  |                                            |
| 1599.1                  | 4.49E+00  |                                            |
| 1664.88                 | 4.10E+00  |                                            |
| 1692.64                 | 4.27E+00  |                                            |
| 1729                    | 4.21E+00  |                                            |
| 1799.09                 | 4.18E+00  |                                            |
| 1864.16                 | 4.22E+00  |                                            |
| 1869.89                 | 6.47E+00  |                                            |
| 1887.92                 | 3.99E+00  |                                            |
| 1945.04                 | 4.74E+00  |                                            |
| 1983.99                 | 3.96E+00  |                                            |
| 1990.07                 | 4.68E+00  | y <sub>15</sub> -H <sub>2</sub> O(77)      |
| 1997.1                  | 4.64E+00  |                                            |

KU2

4571\_054 321 (10.410)

2: TOF MSMS 1364.69LD+  
201

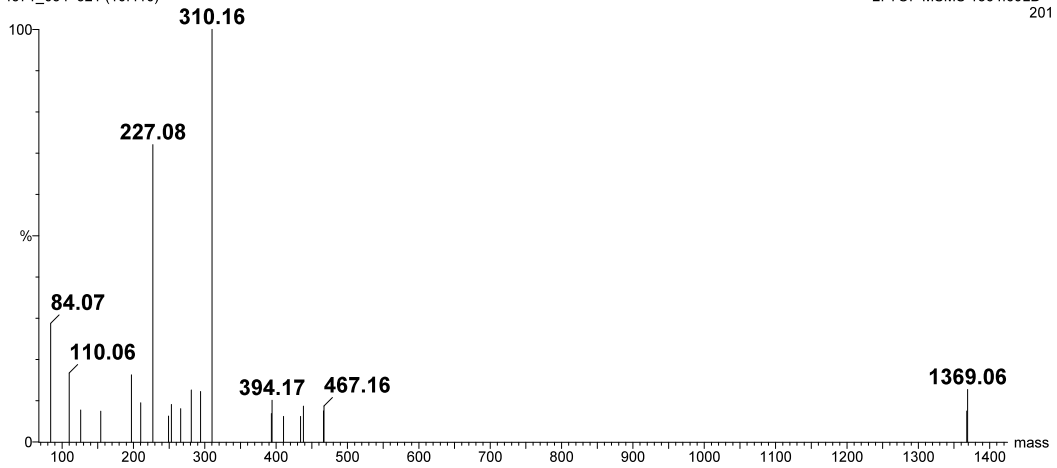

| Ion fragment mass (m/z) | Intensity | Assignment (error - ppm)        |
|-------------------------|-----------|---------------------------------|
| 84.07                   | 5.77E+01  | K(-128)                         |
| 110.06                  | 3.35E+01  |                                 |
| 126.08                  | 1.55E+01  | K(-90)                          |
| 154.08                  | 1.50E+01  |                                 |
| 197.12                  | 3.27E+01  |                                 |
| 210.16                  | 1.90E+01  |                                 |
| 227.08                  | 1.45E+02  | Biotin(0)                       |
| 249.09                  | 1.25E+01  |                                 |
| 253.08                  | 1.82E+01  |                                 |
| 266.16                  | 1.62E+01  |                                 |
| 281.07                  | 2.53E+01  |                                 |
| 294.16                  | 2.46E+01  |                                 |
| 310.16                  | 2.01E+02  | K(Biotin)(0)                    |
| 393.2                   | 1.38E+01  | EYK-28(-34)                     |
| 410.26                  | 1.24E+01  |                                 |
| 434.15                  | 1.24E+01  |                                 |
| 438.23                  | 1.74E+01  |                                 |
| 466.22                  | 1.51E+01  | K(Biotin)E-H <sub>2</sub> O(17) |
